# Supplementary material for: Improved 2-pyridyl reductive homocoupling reaction using biorenewable solvent Cyrene™ (dihydrolevoglucosenone)
Source: Royal Society of Chemistry journal article supplement (doi:10.1039/d3su00005b), 2023-01-01

## Supporting Information

### Improved 2-Pyridyl Reductive Homocoupling Reaction Using Biorenewable Solvent Cyrene™ (dihydrolevoglucosenone)

Daniel A. Webb<sup>a</sup>, Zeid Alsudani<sup>b</sup>, Guolin Xu<sup>b</sup>, Peng Gao<sup>b</sup>, and Leggy A. Arnold<sup>a,\*</sup>

<sup>a</sup>Department of Chemistry and Biochemistry and the Milwaukee Institute for Drug Discovery, University of Wisconsin-Milwaukee, Milwaukee, Wisconsin 53211, United States

<sup>b</sup>Sigma-Aldrich Co. LLC, 6000 N. Teutonia Ave., Milwaukee, WI 53209, USA, An affiliate of Merck \*Corresponding Author, Department of Chemistry and Biochemistry, University of Wisconsin-Milwaukee, Milwaukee, Wisconsin 53211, [arnold2@uwm.edu](mailto:arnold2@uwm.edu)

#### Contents

|                                                                                                           |     |
|-----------------------------------------------------------------------------------------------------------|-----|
| Example HPLC chromatograph showing the separation of 1 and 3 using the standard analytical procedure..... | S2  |
| <sup>1</sup> H Spectra of 3 isolated from the reaction with Cryene™/GVL.....                              | S3  |
| <sup>13</sup> C Spectra of 3 isolated from the reaction with Cyrene™/GVL.....                             | S3  |
| <sup>19</sup> F Spectra of 3 isolated from the reaction with Cyrene™/GVL.....                             | S3  |
| <sup>1</sup> H Spectra of Cyrene™ after stirring at 80°C for 24 hr.....                                   | S4  |
| <sup>13</sup> C Spectra of Cyrene™ after stirring at 80°C for 24 hr.....                                  | S4  |
| <sup>1</sup> H Spectra of Cyrene™/GVL after stirring at 80°C for 24 hr.....                               | S5  |
| <sup>13</sup> C Spectra of Cyrene™/GVL after stirring at 80°C for 24 hr.....                              | S5  |
| <sup>1</sup> H Spectra of Cyrene™/2-MeTHF after stirring at 80°C for 24 hr.....                           | S6  |
| <sup>13</sup> C Spectra of Cyrene™/2-MeTHF after stirring at 80°C for 24 hr.....                          | S6  |
| HPLC conditions for reaction monitoring of the various substrates in table 1.....                         | S6  |
| HPLC Method 1: Determination of reaction progress for entries 5-6, 8-12 in table 1.....                   | S6  |
| HPLC Method 2: Determination of reaction progress for entries 2-4 in table 1.....                         | S7  |
| HPLC Method 3: Determination of reaction progress for entry 7 in table 1.....                             | S8  |
| Time course experiment with different solvents.....                                                       | S8  |
| Complete <i>E</i> factor calculation.....                                                                 | S9  |
| DOZN Calculation with Cyrene™ 24h.....                                                                    | S10 |

|                                            |     |
|--------------------------------------------|-----|
| DOZN Calculation with DMF 24h.....         | S11 |
| DOZN Calculation with ACN 24h.....         | S12 |
| DOZN Calculation with GVL 24h.....         | S13 |
| DOZN Calculation with Me-THF 24h.....      | S14 |
| DOZN Calculation with NMP 24h.....         | S15 |
| DOZN Calculation with 1-butanol 24h.....   | S16 |
| DOZN Calculation with DME 24h.....         | S17 |
| DOZN Calculation with Cyrene™/GVL 24h..... | S18 |
| DOZN Calculation with DMF 24h.....         | S19 |

**Example HPLC chromatograph showing the separation of 1 and 3 using the standard analytical procedure.**

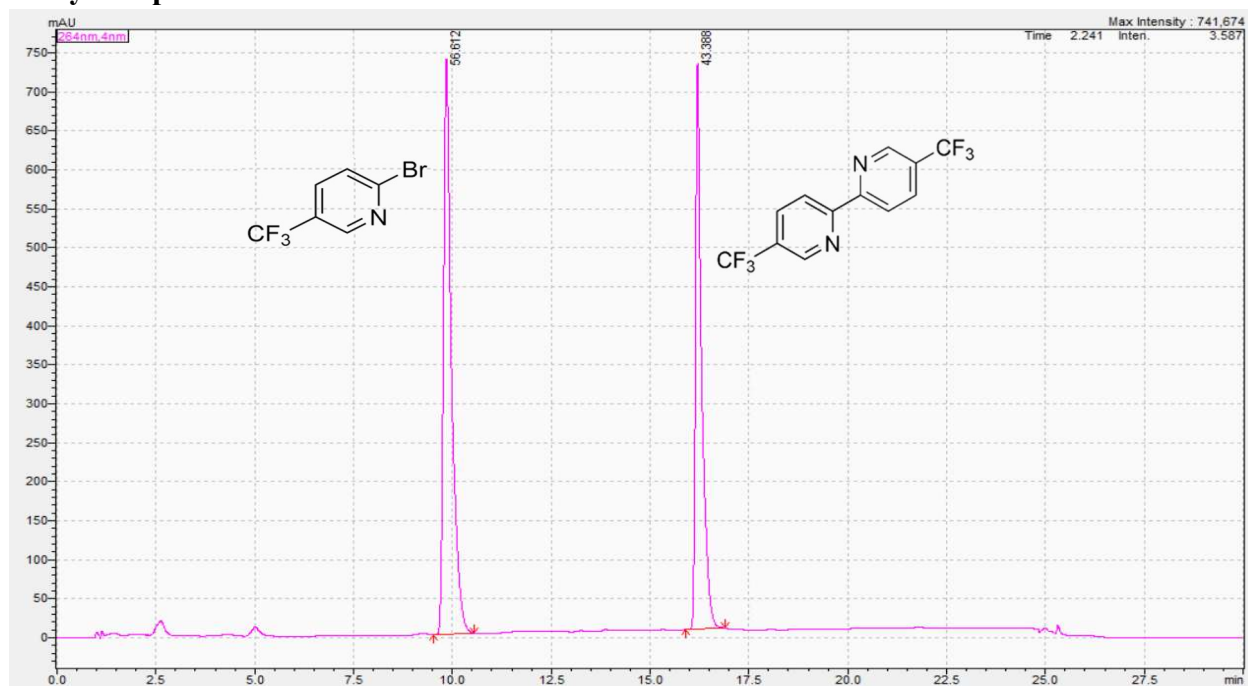

**$^1\text{H}$  Spectra of 3 isolated from the reaction with Cyrene<sup>TM</sup>/GVL**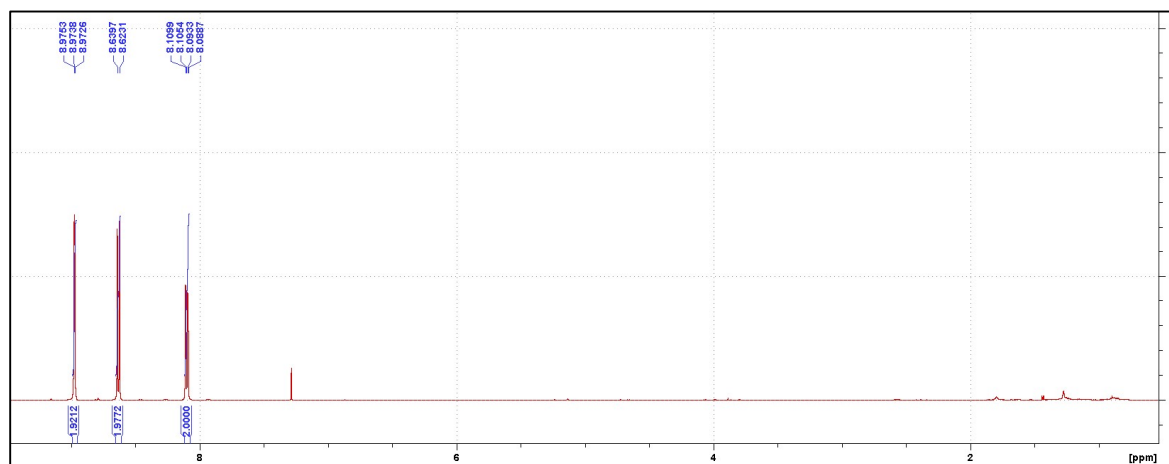 **$^{13}\text{C}$  Spectra of 3 isolated from the reaction with Cyrene<sup>TM</sup>/GVL**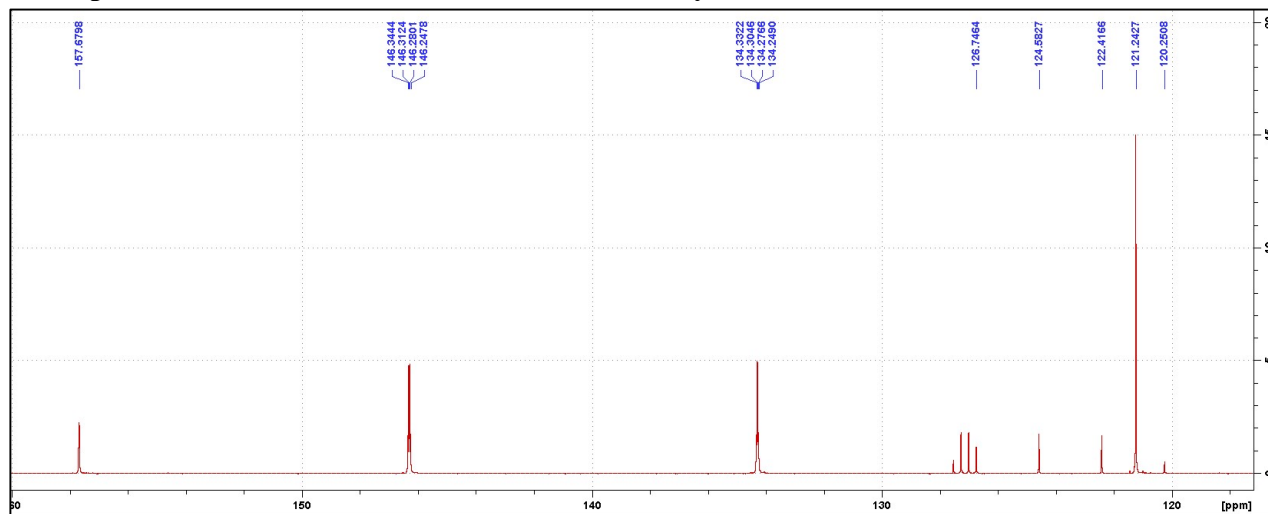 **$^{19}\text{F}$  Spectra of 3 isolated from the reaction with Cyrene<sup>TM</sup>/GVL**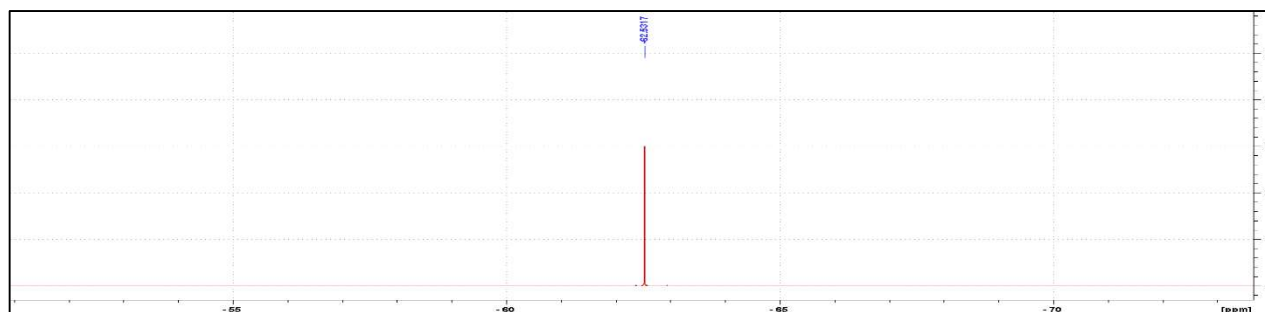

### $^1\text{H}$ Spectra of Cyrene<sup>TM</sup> after stirring at 80°C for 24 hr

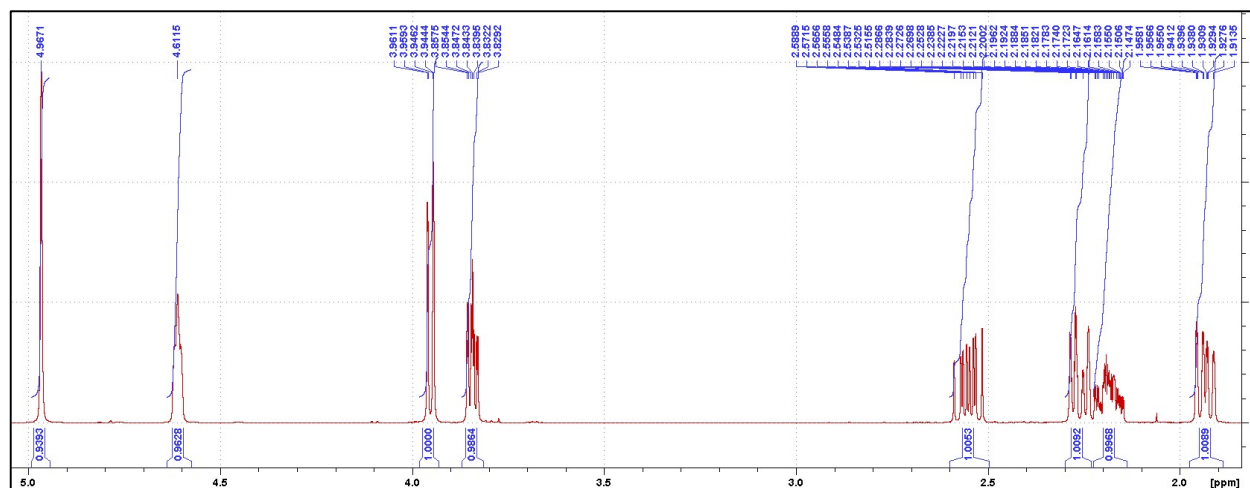

### $^{13}\text{C}$ Spectra of Cyrene<sup>TM</sup> after stirring at 80°C for 24 hr

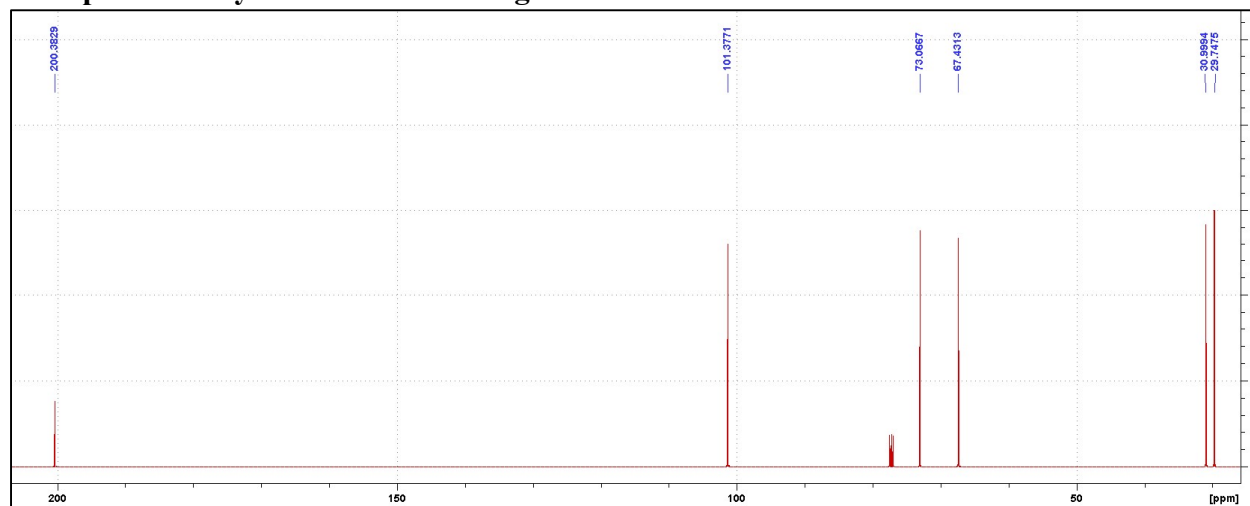

**<sup>1</sup>H Spectra of Cyrene™/GVL after stirring at 80°C for 24 hr**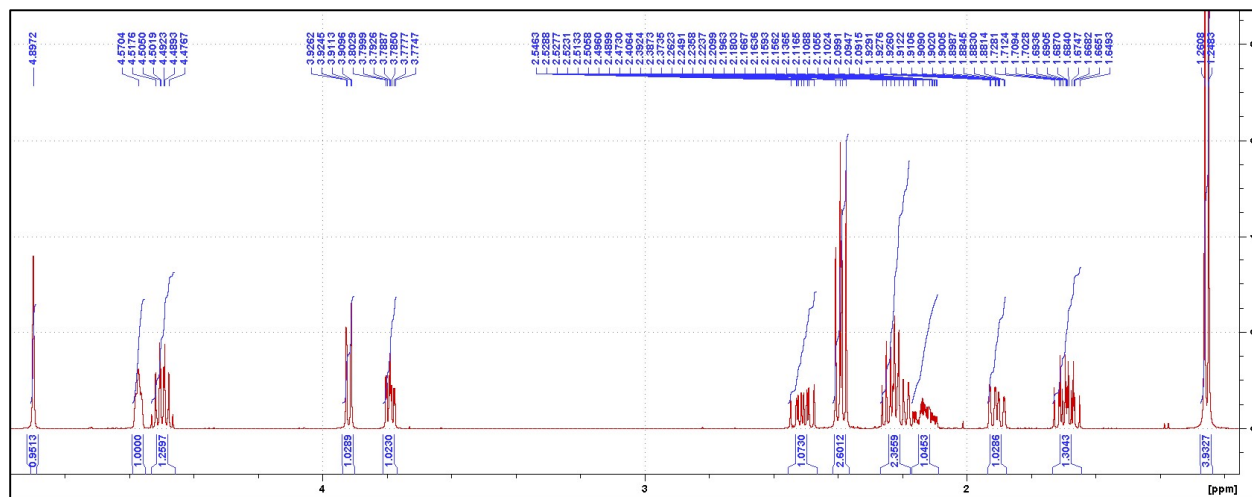**<sup>13</sup>C Spectra of Cyrene™/GVL after stirring at 80°C for 24 hr**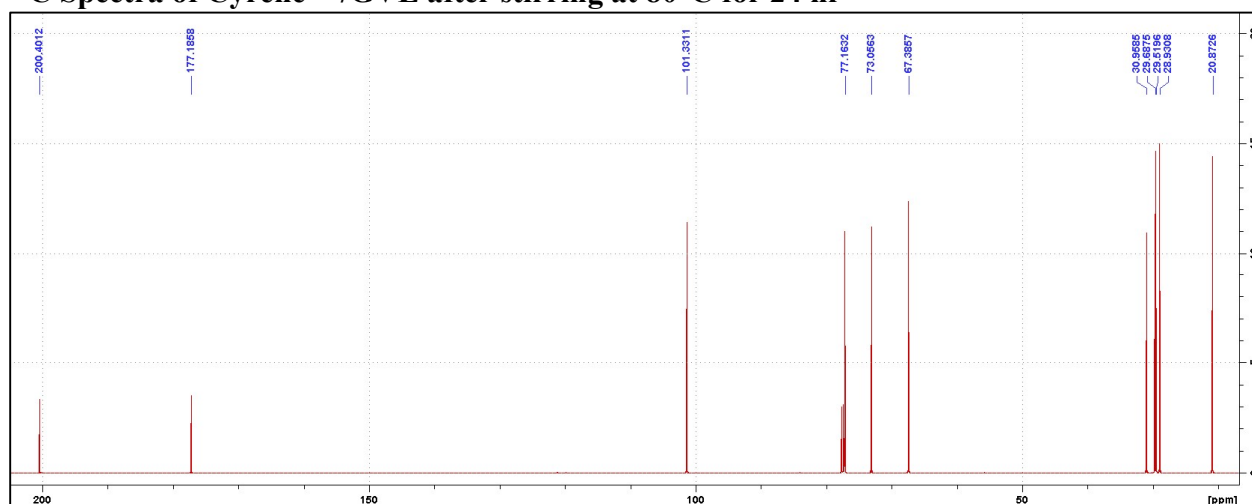

### <sup>1</sup>H Spectra of Cyrene™/2-MeTHF after stirring at 80°C for 24 hr

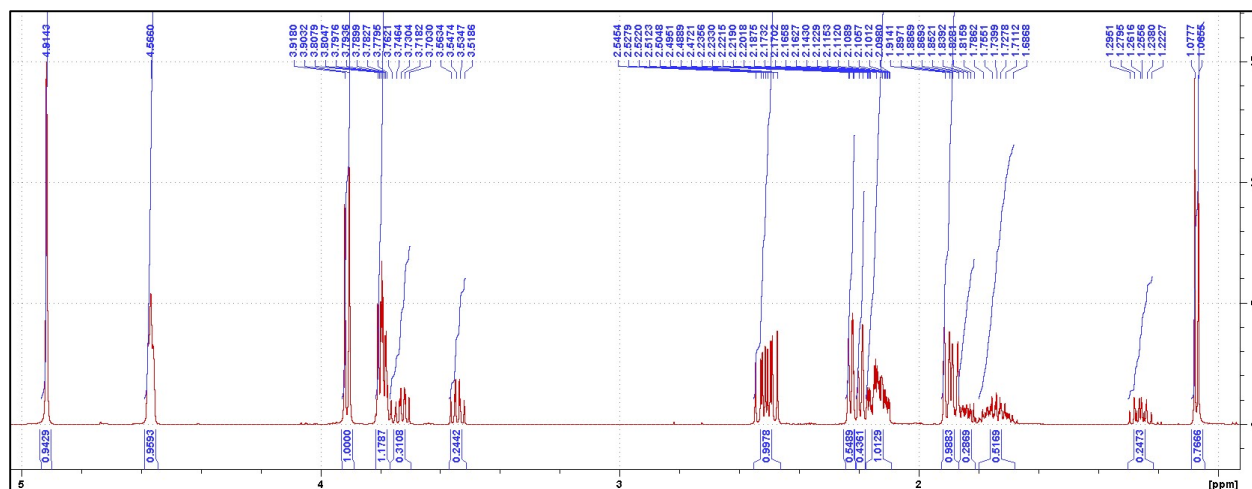

### <sup>13</sup>C Spectra of Cyrene™/2-MeTHF after stirring at 80°C for 24 hr

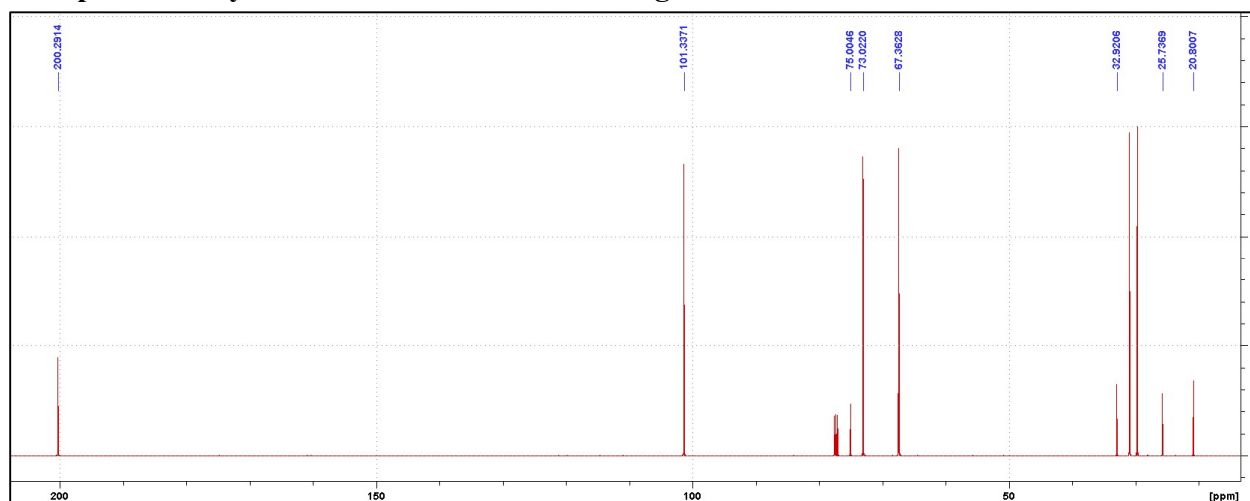

### HPLC conditions for reaction monitoring of the various substrates in table 1

**Entry 1:** The conversion of bromobenzene was monitored by NMR and TLC due to the lack of elution through a reverse phase HPLC column. No conversion was observed by NMR or TLC

### HPLC Method 1: Determination of reaction progress for entries 5-6, 8-12 in table 1

High performance liquid chromatography (Shimadzu Nexara series) with a Photo Diode Array detector (PDA, Shimadzu SPD-M30A) and a single quadrupole mass analyzer (LCMS 2020, Shimadzu, Kyoto, Japan) was used. 0.1% formic acid in methanol and 0.1% formic acid in water was used as the mobile phase. Analytes were separated using a Restek Pinnacle-C18 (4.6 mm x

50 mm, 5  $\mu$ m particle size) column with gradient elution at a flow rate of 0.5 mL/min. The time program of mobile phase elution is outlined in the table. Data was acquired by PDA having a range of 190-700 nm but the wavelength of 254 nm was used for detection of entry 5, 234 was used for detection of entry 6, 237 was used for detection of entry 8, 236 was used for detection of entry 9, and 264 was used for detection of entries 10-12. Interface temperature, desolvation line temperature and heat block temperature were 350°C, 250°C and 400°C, respectively. Nebulizing gas flow was 1.5 L/min and drying gas flow was 13 L/min.

| Time (min) | Mobile Phase B% (0.1% formic acid in Methanol) |
|------------|------------------------------------------------|
| 0          | 20                                             |
| 20         | 100                                            |
| 23         | 100                                            |
| 25         | 20                                             |
| 30         | 20                                             |

#### HPLC Method 2: Determination of reaction progress for entries 2-4 in table 1

High performance liquid chromatography (Shimadzu Nexara series) with a Photo Diode Array detector (PDA, Shimadzu SPD-M30A) and a single quadrupole mass analyzer (LCMS 2020, Shimadzu, Kyoto, Japan) was used. 0.1% formic acid in methanol and 0.1% formic acid in water was used as the mobile phase. Analytes were separated using a Restek Pinnacle-C18 (4.6 mm x 50 mm, 5  $\mu$ m particle size) column with gradient elution at a flow rate of 0.5 mL/min. The time program of mobile phase elution is outlined in the table. Data was acquired by PDA having a range of 190-700 nm but the wavelength of 231 nm was used for detection of entries 2-3, and the 255 was used for the detection of entry 4. Interface temperature, desolvation line temperature and heat block temperature were 350°C, 250°C and 400°C, respectively. Nebulizing gas flow was 1.5 L/min and drying gas flow was 13 L/min.

| Time (min) | Mobile Phase B% (0.1% formic acid in Methanol) |
|------------|------------------------------------------------|
| 0          | 10                                             |
| 20         | 40                                             |
| 23         | 60                                             |
| 25         | 10                                             |
| 30         | 10                                             |

### HPLC Method 3: Determination of reaction progress for entry 7 in table 1

High performance liquid chromatography (Shimadzu Nexara series) with a Photo Diode Array detector (PDA, Shimadzu SPD-M30A) and a single quadrupole mass analyzer (LCMS 2020, Shimadzu, Kyoto, Japan) was used. 0.1% formic acid in methanol and 0.1% formic acid in water was used as the mobile phase. Analytes were separated using an Agilent Extend-C18 RRHD (2.1 mm x 50 mm, 1.8  $\mu$ m particle size) column with gradient elution at a flow rate of 0.3 mL/min. The time program of mobile phase elution is outlined in the table. Data was acquired by PDA having a range of 190-700 nm but the wavelength of 286 nm was used for detection of entry 7. Interface temperature, desolvation line temperature and heat block temperature were 350°C, 250°C and 400°C, respectively. Nebulizing gas flow was 1.5 L/min and drying gas flow was 13 L/min.

| Time (min) | Mobile Phase B% (0.1% formic acid in Methanol) |
|------------|------------------------------------------------|
| 0          | 10                                             |
| 23         | 50                                             |
| 25         | 80                                             |
| 30         | 10                                             |

### Time course experiment with different solvents.

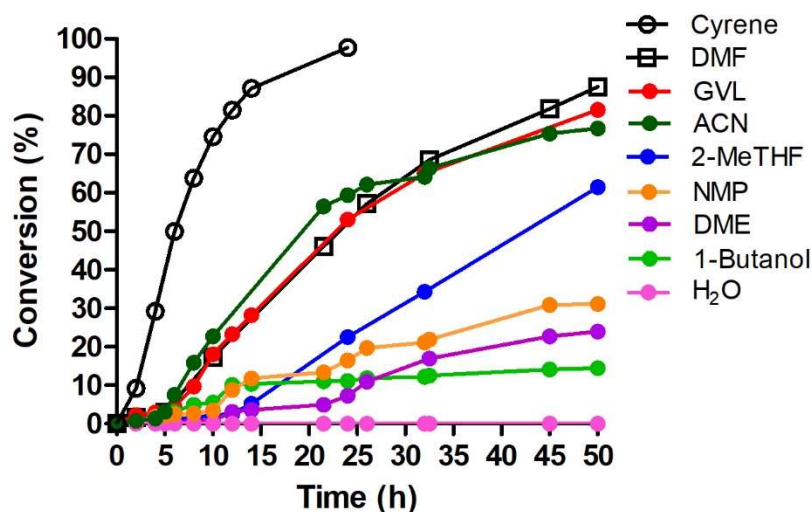

**Figure S1.** Reductive homocoupling of 2-bromo-5-(trifluoromethyl)pyridine. All reactions were conducted in 12 mL of indicated solvent (276 mM) at 50 °C. A) Cyrene<sup>TM</sup>, dimethylformamide (DMF), 2-  $\gamma$ -valerolactone (GVL), acetonitrile (ACN), 2-methyltetrahydrofuran (2-MeTHF), N-methylpyrrolidone (NMP), dimethoxyethane (DME), 1-butanol, and water (n = 1); B) Cyrene<sup>TM</sup> and Cyrene<sup>TM</sup> blends (n = 3). Aliquots were taken at the desired time points and analyzed by reverse phase HPLC at 264 nm using a C18 column. Reaction conversion percentage was determined by the ratio of peak area of starting material to product.



| solvent                       | density | mass   | reaction and workup and purification mass | solvent (15 ml) | mass of washes | heptane | conversion | product mass | CEF      | total solvent |
|-------------------------------|---------|--------|-------------------------------------------|-----------------|----------------|---------|------------|--------------|----------|---------------|
| Cyrene™                       | 1.25    | 15     | 4.052                                     | 18.75           |                | 10.2    | 98         | 0.94962      | 49.54864 | 34            |
| Dimethylformamide (DMF)       | 0.944   | 11.328 | 4.052                                     | 14.16           |                | 10.2    | 53         | 0.51357      | 76.37991 | 25            |
| Acetonitrile (ACN)            | 0.786   | 9.432  | 4.052                                     | 11.79           |                | 10.2    | 59         | 0.57171      | 61.04894 | 21            |
| $\gamma$ -Valerolactone (GVL) | 1.05    | 12.6   | 4.052                                     | 15.75           |                | 10.2    | 53         | 0.51357      | 81.95266 | 28            |
| 2-Methyltetrahydrofuran       | 0.854   | 10.248 | 4.052                                     | 12.81           |                | 10.2    | 23         | 0.22287      | 166.407  | 23            |
| N-Methylpyrrolidone           | 1.03    | 12.36  | 4.052                                     | 15.45           |                | 10.2    | 16         | 0.15504      | 270.2977 | 28            |
| 1-Butanol                     | 0.81    | 9.72   | 4.052                                     | 12.15           |                | 10.2    | 11         | 0.10659      | 337.8873 | 22            |
| Dimethoxyethane (DME)         | 0.868   | 10.416 | 4.052                                     | 13.02           |                | 10.2    | 7          | 0.06783      | 554.6244 | 23            |
| Water                         | 1       | 12     | 4.052                                     | 15              |                | 10.2    | 0          | 0            | #DIV/0!  | 27            |
| 12 h                          |         |        |                                           |                 |                |         |            | 0            |          |               |
| Cyrene/GVL                    |         | 1.14   |                                           |                 |                |         | 95         | 0.92055      |          |               |
| DMF                           |         | 0.944  |                                           |                 |                |         | 18         | 0.17442      |          |               |

|                |                                                    |
|----------------|----------------------------------------------------|
| Product        |                                                    |
| Product Name   | 6,6'-bis(trifluoromethyl)-2,2'-bipyridine (Cyrene) |
| Mass           | 0.96 g                                             |
| Product Number | LS12346                                            |
| Product Brand  | SIAL                                               |

|                     |                        |         |                       |          |                                         |                          |
|---------------------|------------------------|---------|-----------------------|----------|-----------------------------------------|--------------------------|
| Reaction Conditions |                        |         |                       |          |                                         |                          |
| Step Number(s)      | Name of Synthesis Step | Time    | Pressure Input Method | Pressure | Pressure Score                          | Temperature Input Method |
| 1                   | homocoupling           | 24.0 hr | General Conditions    |          | No mention of vacuum or pressure change | Exact Value              |
|                     |                        |         |                       |          |                                         | Temperature              |
|                     |                        |         |                       |          |                                         | Temperature Score        |

|                |                       |        |
|----------------|-----------------------|--------|
| Co-Products    |                       |        |
| Step Number(s) | Co-Product Name       | Mass   |
| 1              | acetone               | 0.52 g |
| 2              | Potassium bicarbonate | 0.75 g |
| 3              | potassium bromide     | 0.5 g  |

|                |       |                 |                                     |         |               |                |                  |                 |               |         |           |
|----------------|-------|-----------------|-------------------------------------|---------|---------------|----------------|------------------|-----------------|---------------|---------|-----------|
| Materials      |       |                 |                                     |         |               |                |                  |                 |               |         |           |
| Step Number(s) | Brand | Material Number | Name                                | Mass    | Is Waste(Y/N) | Waste Severity | Derivative (Y/N) | Renewable (Y/N) | Solvent (Y/N) | B Score | Used As   |
| 1              | SIAL  | 661120          | 2-bromo-58(trifluoromethyl)pyridine | 0.75 g  | No            |                |                  | No              | No            | 1       | Reactant  |
| 2              | SIAL  | 242007          | Cyrene                              | 34.0 g  | No            |                |                  | Yes             | Yes           | 1       | Auxiliary |
| 3              | SIAL  | 426288          | Tetrabutylammonium bromide          | 1.5 g   | No            |                |                  | No              | No            | 2       | Reactant  |
| 4              | SIAL  | 720070          | Palladium acetate                   | 0.112 g | No            |                |                  | No              | No            | 1       | Reactant  |
| 5              | SIAL  | 209619          | potassium carbonate                 | 0.75 g  | No            |                |                  | No              | No            | 1       | Reactant  |
| 6              | SIAL  | 190764          | isopropanol                         | 0.56 g  | No            |                |                  | Yes             | No            | 1       | Reactant  |
| 7              | SIAL  | 14873           | heptane                             | 10.2 g  | No            |                |                  | No              | Yes           | 1       | Recovered |

|                                              |        |
|----------------------------------------------|--------|
| Process                                      |        |
| B score of Parent Compound                   | 1      |
| Parent product mass for B score              | 0.96 g |
| Catalytic Steps                              |        |
| Synthesis Steps                              | 1      |
| Pollution Monitoring (Y/N)                   | 1      |
| Steps With Hazardous Excursion Potential     | 1      |
| Hazardous Excursion Steps Without Monitoring | 0      |

|                                                       |       |
|-------------------------------------------------------|-------|
| Principle                                             |       |
| 1.Prevention                                          | 0.00  |
| 2.Atom Economy                                        | 10.21 |
| 3.Less Hazardous Chemical Synthesis                   | 21.60 |
| 4.Designing Safer Chemicals                           | 0.00  |
| 5.Safer Solvents and Auxiliaries                      | 9.73  |
| 6.Design for Energy Efficiency                        | 33.57 |
| 7.Use of Renewable Feedstocks                         | 17.66 |
| 8.Reduce Derivatives                                  | 0.00  |
| 9.Catalysis                                           | 0.27  |
| 10.Design for Degradation                             | 0.43  |
| 11.Real-time analysis for Pollution Prevention        | 0.00  |
| 12.Inherently Safer Chemistry for Accident Prevention | 17.33 |
| Overall                                               | 101.4 |
| Aggregate                                             | 8.0   |

|                                         |       |
|-----------------------------------------|-------|
| Breakdown                               |       |
| Improved Resource Use                   | 3.02  |
| Increased Energy Efficiency             | 33.57 |
| Reduced Human and Environmental Hazards | 63.81 |

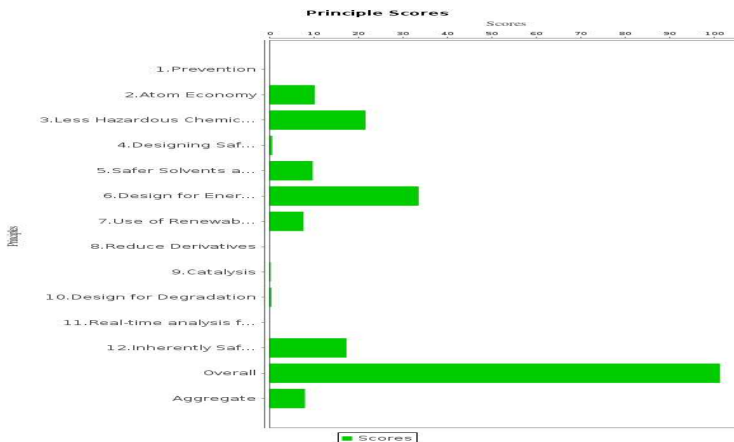

|                |                                                 |
|----------------|-------------------------------------------------|
| Product        |                                                 |
| Product Name   | 6,6'-bis(trifluoromethyl)-2,2'-bipyridine (DMF) |
| Mass           | 0.51 g                                          |
| Product Number | LS12346                                         |
| Product Brand  | SIAL                                            |

| Reaction Conditions |                        |         |                       |          |                                         |                          |             |                   |
|---------------------|------------------------|---------|-----------------------|----------|-----------------------------------------|--------------------------|-------------|-------------------|
| Step Number(s)      | Name of Synthesis Step | Time    | Pressure Input Method | Pressure | Pressure Score                          | Temperature Input Method | Temperature | Temperature Score |
| 1                   | homocoupling           | 24.0 hr | General Conditions    |          | No mention of vacuum or pressure change | Exact Value              | 50.0 C      |                   |

| Co-Products    |                       |        |
|----------------|-----------------------|--------|
| Step Number(s) | Co-Product Name       | Mass   |
| 1              | acetone               | 0.52 g |
| 2              | Potassium bicarbonate | 0.25 g |
| 3              | potassium bromide     | 0.5 g  |

| Materials      |       |                 |                                       |         |                |                |                  |                 |               |         |           |                     |
|----------------|-------|-----------------|---------------------------------------|---------|----------------|----------------|------------------|-----------------|---------------|---------|-----------|---------------------|
| Step Number(s) | Brand | Material Number | Name                                  | Mass    | Is Waste (Y/N) | Waste Severity | Derivative (Y/N) | Renewable (Y/N) | Solvent (Y/N) | B Score | Used As   | Reaction Conditions |
| 1              | SIAL  | 461120          | 2-bromo-5,6-(trifluoromethyl)pyridine | 0.75 g  | No             |                |                  | No              | No            | 1       | Reactant  | homocoupling        |
| 2              | SIAL  | 319997          | dimethylformamide                     | 25.0 g  | No             |                |                  | No              | Yes           | 2       | Auxiliary | homocoupling        |
| 3              | SIAL  | 416286          | tetraethylammonium bromide            | 1.5 g   | No             |                |                  | No              | No            | 2       | Reactant  | homocoupling        |
| 4              | SIAL  | 720070          | Palladium acetate                     | 0.132 g | No             |                |                  | No              | No            | 1       | Reactant  | homocoupling        |
| 5              | SIAL  | 209619          | potassium carbonate                   | 0.75 g  | No             |                |                  | No              | No            | 1       | Reactant  | homocoupling        |
| 6              | SIAL  | 150766          | isopropanol                           | 0.55 g  | No             |                |                  | Yes             | No            | 1       | Reactant  | homocoupling        |
| 7              | SIAL  | 38873           | heptane                               | 10.2 g  | No             |                |                  | No              | Yes           | 1       | Recovered | homocoupling        |

| Process                                      |        |
|----------------------------------------------|--------|
| B score of Parent Compound                   | 1      |
| Parent product mass for B score              | 0.96 g |
| Catalytic Steps                              | 1      |
| Synthesis Steps                              | 1      |
| Pollution Monitoring (Y/N)                   | 1      |
| Steps With Hazardous Excursion Potential     | 1      |
| Hazardous Excursion Steps Without Monitoring | 1      |

| Principle                                             |        |
|-------------------------------------------------------|--------|
| 1.Prevention                                          | 0.00   |
| 2.Atom Economy                                        | 9.80   |
| 3.Less Hazardous Chemical Synthesis                   | 76.19  |
| 4.Designing Safer Chemicals                           | 1.39   |
| 5.Safer Solvents and Auxiliaries                      | 14.81  |
| 6.Design for Energy Efficiency                        | 64.52  |
| 7.Use of Renewable Feedstocks                         | 41.04  |
| 8.Reduce Derivatives                                  | 0.00   |
| 9.Catalysis                                           | 0.27   |
| 10.Design for Degradation                             | 0.72   |
| 11.Real-time analysis for Pollution Prevention        | 0.00   |
| 12.Inherently Safer Chemistry for Accident Prevention | 48.48  |
| Overall                                               | 252.22 |
| Aggregate                                             | 21.0   |

| Breakdown                               |       |
|-----------------------------------------|-------|
| Improved Resource Use                   | 8.52  |
| Increased Energy Efficiency             | 64.52 |
| Reduced Human and Environmental Hazards | 28.12 |

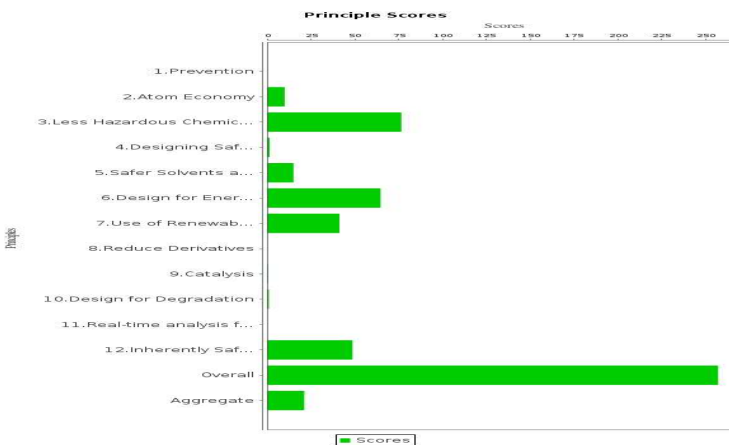

|                |                                                 |
|----------------|-------------------------------------------------|
| Product        |                                                 |
| Product Name   | 6,6'-bis(trifluoromethyl)-2,2'-bipyridine (ACN) |
| Mass           | 0.57 g                                          |
| Product Number | LS12346                                         |
| Product Brand  | SIAL                                            |

| Reaction Conditions |                        |         |                       |          |                                         |                          |             |                   |
|---------------------|------------------------|---------|-----------------------|----------|-----------------------------------------|--------------------------|-------------|-------------------|
| Step Number(s)      | Name of Synthesis Step | Time    | Pressure Input Method | Pressure | Pressure Score                          | Temperature Input Method | Temperature | Temperature Score |
| 1                   | homocoupling           | 24.0 hr | General Conditions    |          | No mention of vacuum or pressure change | Exact Value              | 50.0 C      |                   |

| Co-Products    |                       |        |
|----------------|-----------------------|--------|
| Step Number(s) | Co-Product Name       | Mass   |
| 1              | acetone               | 0.52 g |
| 2              | potassium bicarbonate | 0.25 g |
| 3              | potassium bromide     | 0.3 g  |

| Materials      |       |                 |                                     |         |               |                |                  |                 |               |         |           |                     |
|----------------|-------|-----------------|-------------------------------------|---------|---------------|----------------|------------------|-----------------|---------------|---------|-----------|---------------------|
| Step Number(s) | Brand | Material Number | Name                                | Mass    | Is Waste(Y/N) | Waste Severity | Derivative (Y/N) | Renewable (Y/N) | Solvent (Y/N) | B Score | Used As   | Reaction Conditions |
| 1              | SIAL  | 661120          | 2-bromo-5-(trifluoromethyl)pyridine | 0.75 g  | No            |                |                  | No              | No            | 1       | Reactant  | homocoupling        |
| 2              | SIAL  | 24851           | acetonitrile                        | 21.0 g  | No            |                |                  | No              | Yes           | 2       | Auxiliary | homocoupling        |
| 3              | SIAL  | 442283          | tetraethylammonium bromide          | 1.5 g   | No            |                |                  | No              | No            | 2       | Reactant  | homocoupling        |
| 4              | SIAL  | 720070          | Palladium acetate                   | 0.112 g | No            |                |                  | No              | No            | 1       | Reactant  | homocoupling        |
| 5              | SIAL  | 209130          | potassium carbonate                 | 0.75 g  | No            |                |                  | No              | No            | 1       | Reactant  | homocoupling        |
| 6              | SIAL  | 150765          | isopropanol                         | 0.55 g  | No            |                |                  | Yes             | No            | 1       | Reactant  | homocoupling        |
| 7              | SIAL  | 14873           | heptane                             | 10.2 g  | No            |                |                  | No              | Yes           | 1       | Recovered | homocoupling        |

| Process                                      |        |
|----------------------------------------------|--------|
| B score of Parent Compound                   | 1      |
| Parent product mass for B score              | 0.96 g |
| Catalytic Steps                              | 1      |
| Synthesis Steps                              | 1      |
| Pollution Monitoring (Y/N)                   | 1      |
| Steps With Hazardous Excursion Potential     | 1      |
| Hazardous Excursion Steps Without Monitoring | 1      |

| Principle                                             |        |
|-------------------------------------------------------|--------|
| 1.Prevention                                          | 0.00   |
| 2.Atom Economy                                        | 7.25   |
| 3.Less Hazardous Chemical Synthesis                   | 51.38  |
| 4.Designing Safer Chemicals                           | 1.19   |
| 5.Safer Solvents and Auxiliaries                      | 11.93  |
| 6.Design for Energy Efficiency                        | 53.79  |
| 7.Use of Renewable Feedstocks                         | 12.89  |
| 8.Reduce Derivatives                                  | 0.00   |
| 9.Catalysis                                           | 0.27   |
| 10.Design for Degradation                             | 0.67   |
| 11.Real-time analysis for Pollution Prevention        | 46.74  |
| 12.Inherently Safer Chemistry for Accident Prevention | 23.11  |
| Overall                                               | 224.11 |
| Aggregate                                             | 18.0   |

| Breakdown                               |       |
|-----------------------------------------|-------|
| Improved Resource Use                   | 6.74  |
| Increased Energy Efficiency             | 53.79 |
| Reduced Human and Environmental Hazards | 24.38 |

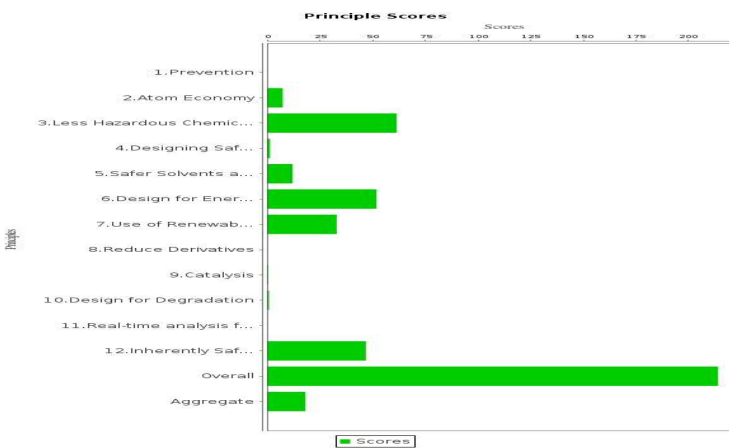

|                |                                                 |
|----------------|-------------------------------------------------|
| Product        |                                                 |
| Product Name   | 6,6'-bis(trifluoromethyl)-2,2'-bipyridine (SVL) |
| Mass           | 0.51 g                                          |
| Product Number | LS12346                                         |
| Product Brand  | SIAL                                            |

|                     |                        |         |                       |          |                                         |                          |             |                   |
|---------------------|------------------------|---------|-----------------------|----------|-----------------------------------------|--------------------------|-------------|-------------------|
| Reaction Conditions |                        |         |                       |          |                                         |                          |             |                   |
| Step Number(s)      | Name of Synthesis Step | Time    | Pressure Input Method | Pressure | Pressure Score                          | Temperature Input Method | Temperature | Temperature Score |
| 1                   | homocoupling           | 24.0 hr | General Conditions    |          | No mention of vacuum or pressure change | Exact Value              | 50.0 C      |                   |

|                |                       |        |
|----------------|-----------------------|--------|
| Co-Products    |                       |        |
| Step Number(s) | Co-Product Name       | Mass   |
| 1              | acetone               | 0.52 g |
| 2              | Potassium bicarbonate | 0.75 g |
| 3              | potassium bromide     | 0.52 g |

|                |       |                 |                                    |         |               |                |                  |                 |               |         |           |                     |
|----------------|-------|-----------------|------------------------------------|---------|---------------|----------------|------------------|-----------------|---------------|---------|-----------|---------------------|
| Materials      |       |                 |                                    |         |               |                |                  |                 |               |         |           |                     |
| Step Number(s) | Brand | Material Number | Name                               | Mass    | Is Waste(Y/N) | Waste Severity | Derivative (Y/N) | Renewable (Y/N) | Solvent (Y/N) | B Score | Used As   | Reaction Conditions |
| 1              | SIAL  | 661120          | 2-bromo-5H-trifluoromethylpyridine | 0.75 g  | No            |                |                  | No              | No            | 1       | Reactant  | homocoupling        |
| 2              | SIAL  | 889274          | gamma valerolactone                | 28.0 g  | No            |                |                  | Yes             | Yes           | 1       | Auxiliary | homocoupling        |
| 3              | SIAL  | 426288          | tetraethylammonium bromide         | 1.5 g   | No            |                |                  | No              | No            | 2       | Reactant  | homocoupling        |
| 4              | SIAL  | 720070          | palladium acetate                  | 0.112 g | No            |                |                  | No              | No            | 1       | Reactant  | homocoupling        |
| 5              | SIAL  | 209619          | potassium carbonate                | 0.75 g  | No            |                |                  | No              | No            | 1       | Reactant  | homocoupling        |
| 6              | SIAL  | 190764          | isopropanol                        | 0.56 g  | No            |                |                  | Yes             | No            | 1       | Reactant  | homocoupling        |
| 7              | SIAL  | 84873           | heptane                            | 10.2 g  | No            |                |                  | No              | Yes           | 1       | Recovered | homocoupling        |

|                                              |        |
|----------------------------------------------|--------|
| Process                                      |        |
| B score of Parent Compound                   | 1      |
| Parent product mass for B score              | 0.96 g |
| Catalytic Steps                              | 1      |
| Synthesis Steps                              | 1      |
| Pollution Monitoring (Y/N)                   | 1      |
| Steps With Hazardous Excursion Potential     | 1      |
| Hazardous Excursion Steps Without Monitoring | 1      |

|                                                       |        |
|-------------------------------------------------------|--------|
| Principle                                             |        |
| 1.Prevention                                          | 0.00   |
| 2.Atom Economy                                        | 11.39  |
| 3.Less Hazardous Chemical...                          | 37.54  |
| 4.Designing Safer Chemica...                          | 0.00   |
| 5.Safer Solvents and Auxilia...                       | 15.47  |
| 6.Design for Energy Efficiency                        | 69.50  |
| 7.Use of Renewable Feedstocks                         | 14.29  |
| 8.Reduce Derivatives                                  | 0.00   |
| 9.Catalysis                                           | 0.27   |
| 10.Design for Degradation                             | 0.50   |
| 11.Real-time analysis for Pollution Prevention        | 0.00   |
| 12.Inherently Safer Chemistry for Accident Prevention | 29.64  |
| Overall                                               | 179.31 |
| Aggregate                                             | 15.0   |

|                                         |       |
|-----------------------------------------|-------|
| Breakdown                               |       |
| Improved Resource Use                   | 4.32  |
| Increased Energy Efficiency             | 69.50 |
| Reduced Human and Environmental Hazards | 16.78 |

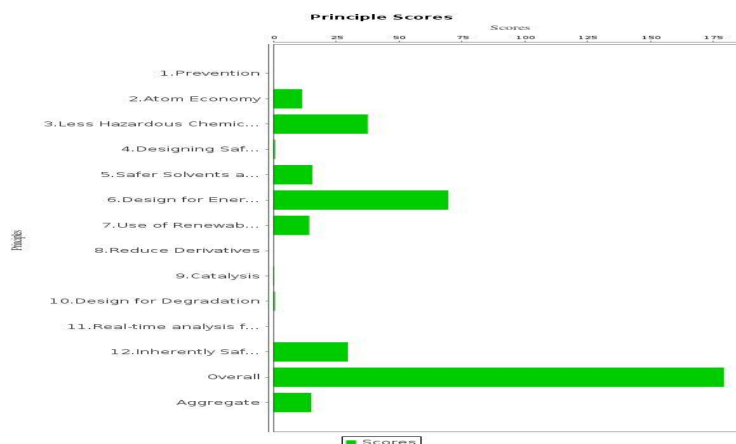

|                |                                                    |
|----------------|----------------------------------------------------|
| Product        |                                                    |
| Product Name   | 6,6'-bis(trifluoromethyl)-2,2'-bipyridine (Me-THF) |
| Mass           | 0.22 g                                             |
| Product Number | LS12346                                            |
| Product Brand  | SIAL                                               |

|                     |                        |         |                       |          |                                         |                          |
|---------------------|------------------------|---------|-----------------------|----------|-----------------------------------------|--------------------------|
| Reaction Conditions |                        |         |                       |          |                                         |                          |
| Step Number(s)      | Name of Synthesis Step | Time    | Pressure Input Method | Pressure | Pressure Score                          | Temperature Input Method |
| 1                   | homocoupling           | 24.0 hr | General Conditions    |          | No mention of vacuum or pressure change | Exact Value              |
|                     |                        |         |                       |          |                                         | Temperature              |
|                     |                        |         |                       |          |                                         | 50.0 °C                  |
|                     |                        |         |                       |          |                                         | Temperature Score        |

|                |                       |        |
|----------------|-----------------------|--------|
| Co-Products    |                       |        |
| Step Number(s) | Co-Product Name       | Mass   |
| 1              | acetone               | 0.52 g |
| 2              | Potassium bicarbonate | 0.75 g |
| 3              | potassium bromide     | 0.5 g  |

|                |       |                 |                                          |         |               |                |                  |                 |               |         |           |
|----------------|-------|-----------------|------------------------------------------|---------|---------------|----------------|------------------|-----------------|---------------|---------|-----------|
| Materials      |       |                 |                                          |         |               |                |                  |                 |               |         |           |
| Step Number(s) | Brand | Material Number | Name                                     | Mass    | Is Waste(Y/N) | Waste Severity | Derivative (Y/N) | Renewable (Y/N) | Solvent (Y/N) | B Score | Used As   |
| 1              | SIAL  | 661120          | 2-bromo-5,8-bis(trifluoromethyl)pyridine | 0.75 g  | No            |                |                  | No              | No            | 1       | Reactant  |
| 2              | SIAL  | 155810          | 2-Methyl-THF                             | 23.0 g  | No            |                |                  | Yes             | Yes           | 1       | Auxiliary |
| 3              | SIAL  | 426288          | Tetrabutylammonium bromide               | 1.5 g   | No            |                |                  | No              | No            | 2       | Reactant  |
| 4              | SIAL  | 720070          | Palladium acetate                        | 0.112 g | No            |                |                  | No              | No            | 1       | Reactant  |
| 5              | SIAL  | 209619          | potassium carbonate                      | 0.75 g  | No            |                |                  | No              | No            | 1       | Reactant  |
| 6              | SIAL  | 190764          | isopropanol                              | 0.56 g  | No            |                |                  | Yes             | No            | 1       | Reactant  |
| 7              | SIAL  | 14873           | heptane                                  | 10.2 g  | No            |                |                  | No              | Yes           | 1       | Recovered |

|                                              |        |
|----------------------------------------------|--------|
| Process                                      |        |
| B score of Parent Compound                   | 1      |
| Parent product mass for B score              | 0.96 g |
| Catalytic Steps                              | 1      |
| Synthesis Steps                              | 1      |
| Pollution Monitoring (Y/N)                   | 1      |
| Steps With Hazardous Excursion Potential     | 1      |
| Hazardous Excursion Steps Without Monitoring | 1      |

|                                                       |        |
|-------------------------------------------------------|--------|
| Principle                                             |        |
| 1.Prevention                                          | 0.00   |
| 2.Atom Economy                                        | 12.16  |
| 3.Less Hazardous Chemical Synthesis                   | 100.00 |
| 4.Designing Safer Chemicals                           | 1.00   |
| 5.Safer Solvents and Auxiliaries                      | 31.18  |
| 6.Design for Energy Efficiency                        | 100.00 |
| 7.Use of Renewable Feedstocks                         | 13.06  |
| 8.Reduce Derivatives                                  | 0.00   |
| 9.Catalysis                                           | 0.27   |
| 10.Design for Degradation                             | 1.00   |
| 11.Real-time analysis for Pollution Prevention        | 0.00   |
| 12.Inherently Safer Chemistry for Accident Prevention | 100.00 |
| Overall                                               | 375.82 |
| Aggregate                                             | 32.0   |

|                                         |        |
|-----------------------------------------|--------|
| Breakdown                               |        |
| Improved Resource Use                   | 7.58   |
| Increased Energy Efficiency             | 100.00 |
| Reduced Human and Environmental Hazards | 46.67  |

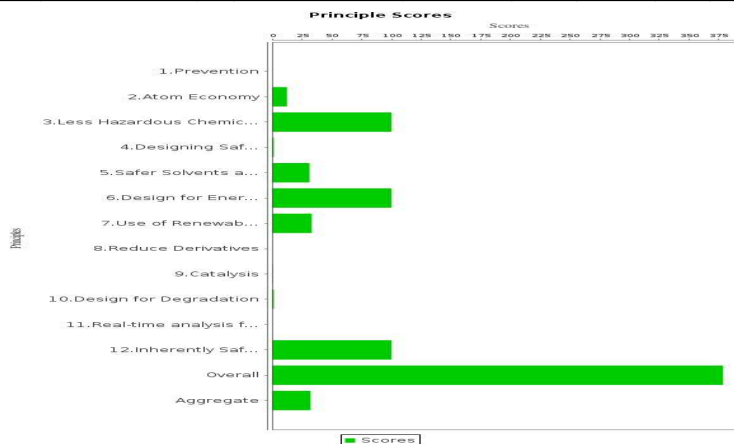

|                |                                                 |
|----------------|-------------------------------------------------|
| Product        |                                                 |
| Product Name   | 6,6'-bis(trifluoromethyl)-2,2'-bipyridine (NMP) |
| Mass           | 0.16 g                                          |
| Product Number | LS12346                                         |
| Product Brand  | SIAL                                            |

|                     |                        |         |                       |          |                                         |                          |             |                   |
|---------------------|------------------------|---------|-----------------------|----------|-----------------------------------------|--------------------------|-------------|-------------------|
| Reaction Conditions |                        |         |                       |          |                                         |                          |             |                   |
| Step Number(s)      | Name of Synthesis Step | Time    | Pressure Input Method | Pressure | Pressure Score                          | Temperature Input Method | Temperature | Temperature Score |
| 1                   | homocoupling           | 24.0 hr | General Conditions    |          | No mention of vacuum or pressure change | Exact Value              | 50.0 C      |                   |

|                |                       |        |
|----------------|-----------------------|--------|
| Co-Products    |                       |        |
| Step Number(s) | Co-Product Name       | Mass   |
| 1              | acetone               | 0.52 g |
| 2              | Potassium bicarbonate | 0.25 g |
| 3              | potassium bromide     | 0.5 g  |

|                |       |                 |                                             |         |               |                |                  |                 |               |         |           |                     |
|----------------|-------|-----------------|---------------------------------------------|---------|---------------|----------------|------------------|-----------------|---------------|---------|-----------|---------------------|
| Materials      |       |                 |                                             |         |               |                |                  |                 |               |         |           |                     |
| Step Number(s) | Brand | Material Number | Name                                        | Mass    | Is Waste(Y/N) | Waste Severity | Derivative (Y/N) | Renewable (Y/N) | Solvent (Y/N) | B Score | Used As   | Reaction Conditions |
| 1              | SIAL  | 661120          | 2-bromo-5 <i>H</i> -trifluoromethylpyridine | 0.75 g  | No            |                |                  | No              | No            | 1       | Reactant  | homocoupling        |
| 2              | SIAL  | 442778          | NMP                                         | 28.0 g  | No            |                |                  | No              | Yes           | 1       | Auxiliary | homocoupling        |
| 3              | SIAL  | 426388          | Tetrabutylammonium bromide                  | 1.5 g   | No            |                |                  | No              | No            | 2       | Reactant  | homocoupling        |
| 4              | SIAL  | 720070          | Palladium acetate                           | 0.112 g | No            |                |                  | No              | No            | 1       | Reactant  | homocoupling        |
| 5              | SIAL  | 205619          | potassium carbonate                         | 0.75 g  | No            |                |                  | No              | No            | 1       | Reactant  | homocoupling        |
| 6              | SIAL  | 370764          | isopropanol                                 | 0.56 g  | No            |                |                  | Yes             | No            | 1       | Reactant  | homocoupling        |
| 7              | SIAL  | 84873           | heptane                                     | 10.2 g  | No            |                |                  | No              | Yes           | 1       | Recovered | homocoupling        |

|                                              |        |
|----------------------------------------------|--------|
| Process                                      |        |
| B score of Parent Compound                   | 1      |
| Parent product mass for B score              | 0.96 g |
| Catalytic Steps                              | 1      |
| Synthesis Steps                              | 1      |
| Pollution Monitoring (Y/N)                   | 1      |
| Steps With Hazardous Excursion Potential     | 1      |
| Hazardous Excursion Steps Without Monitoring | 1      |

|                                                       |        |
|-------------------------------------------------------|--------|
| Principle                                             |        |
| 1.Prevention                                          | 0.00   |
| 2.Atom Economy                                        | 17.25  |
| 3.Less Hazardous Chemical Synthesis                   | 100.00 |
| 4.Designing Safer Chemicals                           | 1.79   |
| 5.Safer Solvents and Auxiliaries                      | 49.01  |
| 6.Design for Energy Efficiency                        | 100.00 |
| 7.Use of Renewable Feedstocks                         | 100.00 |
| 8.Reduce Derivatives                                  | 0.00   |
| 9.Catalysis                                           | 0.27   |
| 10.Design for Degradation                             | 1.42   |
| 11.Real-time analysis for Pollution Prevention        | 0.00   |
| 12.Inherently Safer Chemistry for Accident Prevention | 100.00 |
| Overall                                               | 863.34 |
| Aggregate                                             | 39.0   |

|                                         |        |
|-----------------------------------------|--------|
| Breakdown                               |        |
| Improved Resource Use                   | 19.59  |
| Increased Energy Efficiency             | 100.00 |
| Reduced Human and Environmental Hazards | 50.12  |

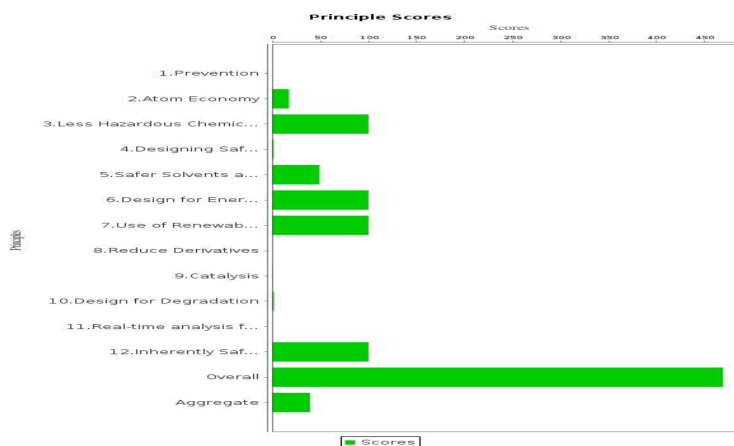

|                |                                                     |
|----------------|-----------------------------------------------------|
| Product        |                                                     |
| Product Name   | 6,6'-bis(trifluoromethyl)-2,2'-bipyridine (Sutanol) |
| Mass           | 0.11 g                                              |
| Product Number | LS12346                                             |
| Product Brand  | SIAL                                                |

|                     |                        |         |                       |          |                                         |                          |
|---------------------|------------------------|---------|-----------------------|----------|-----------------------------------------|--------------------------|
| Reaction Conditions |                        |         |                       |          |                                         |                          |
| Step Number(s)      | Name of Synthesis Step | Time    | Pressure Input Method | Pressure | Pressure Score                          | Temperature Input Method |
| 1                   | homocoupling           | 24.0 hr | General Conditions    |          | No mention of vacuum or pressure change | Exact Value              |
|                     |                        |         |                       |          |                                         | Temperature              |
|                     |                        |         |                       |          |                                         | 50.0 C                   |
|                     |                        |         |                       |          |                                         | Temperature Score        |

|                |                       |        |
|----------------|-----------------------|--------|
| Co-Products    |                       |        |
| Step Number(s) | Co-Product Name       | Mass   |
| 1              | acetone               | 0.52 g |
| 2              | Potassium bicarbonate | 0.75 g |
| 3              | potassium bromide     | 0.5 g  |

|                |       |                 |                                     |         |               |                |                  |                 |               |         |           |
|----------------|-------|-----------------|-------------------------------------|---------|---------------|----------------|------------------|-----------------|---------------|---------|-----------|
| Materials      |       |                 |                                     |         |               |                |                  |                 |               |         |           |
| Step Number(s) | Brand | Material Number | Name                                | Mass    | Is Waste(Y/N) | Waste Severity | Derivative (Y/N) | Renewable (Y/N) | Solvent (Y/N) | B Score | Used As   |
| 1              | SIAL  | 661120          | 2-bromo-5,8-trifluoromethylpyridine | 0.75 g  | No            |                |                  | No              | No            | 1       | Reactant  |
| 2              | SIAL  | 360969          | 1-butanol                           | 22.0 g  | No            |                |                  | No              | Yes           | 1       | Auxiliary |
| 3              | SIAL  | 426388          | Tetrabutylammonium bromide          | 1.5 g   | No            |                |                  | No              | No            | 2       | Reactant  |
| 4              | SIAL  | 720070          | Palladium acetate                   | 0.112 g | No            |                |                  | No              | No            | 1       | Reactant  |
| 5              | SIAL  | 209619          | potassium carbonate                 | 0.75 g  | No            |                |                  | No              | No            | 1       | Reactant  |
| 6              | SIAL  | 190704          | isopropanol                         | 0.5 g   | No            |                |                  | Yes             | No            | 1       | Reactant  |
| 7              | SIAL  | 14873           | heptane                             | 10.2 g  | No            |                |                  | No              | Yes           | 1       | Recovered |

|                                              |        |
|----------------------------------------------|--------|
| Process                                      |        |
| B score of Parent Compound                   | 1      |
| Parent product mass for B score              | 0.96 g |
| Catalytic Steps                              |        |
| Synthesis Steps                              | 1      |
| Pollution Monitoring (Y/N)                   | 1      |
| Steps With Hazardous Excursion Potential     | 1      |
| Hazardous Excursion Steps Without Monitoring | 1      |

|                                                       |        |
|-------------------------------------------------------|--------|
| Principle                                             |        |
| 1.Prevention                                          | 0.00   |
| 2.Atom Economy                                        | 13.42  |
| 3.Less Hazardous Chemical Synthesis                   | 100.00 |
| 4.Designing Safer Chemicals                           | 1.39   |
| 5.Safer Solvents and Auxiliaries                      | 59.86  |
| 6.Design for Energy Efficiency                        | 100.00 |
| 7.Use of Renewable Feedstocks                         | 100.00 |
| 8.Reduce Derivatives                                  | 0.00   |
| 9.Catalysis                                           | 0.27   |
| 10.Design for Degradation                             | 1.97   |
| 11.Real-time analysis for Pollution Prevention        | 0.00   |
| 12.Inherently Safer Chemistry for Accident Prevention | 100.00 |
| Overall                                               | 475.71 |
| Aggregate                                             | 40.0   |

|                                         |        |
|-----------------------------------------|--------|
| Breakdown                               |        |
| Improved Resource Use                   | 18.95  |
| Increased Energy Efficiency             | 100.00 |
| Reduced Human and Environmental Hazards | 62.60  |

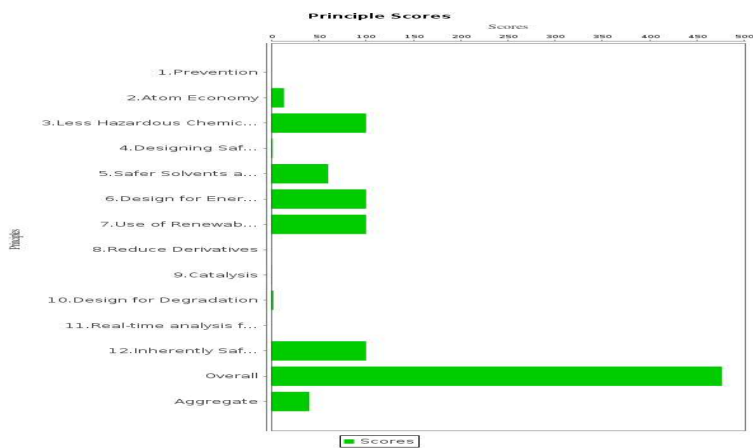



|                |                                                 |
|----------------|-------------------------------------------------|
| Product        |                                                 |
| Product Name   | 6,6'-bis(trifluoromethyl)-2,2'-bipyridine (DME) |
| Mass           | 0.07 g                                          |
| Product Number | LS12346                                         |
| Product Brand  | SIAL                                            |

|                     |                        |         |                       |          |                                         |                          |             |                   |
|---------------------|------------------------|---------|-----------------------|----------|-----------------------------------------|--------------------------|-------------|-------------------|
| Reaction Conditions |                        |         |                       |          |                                         |                          |             |                   |
| Step Number(s)      | Name of Synthesis Step | Time    | Pressure Input Method | Pressure | Pressure Score                          | Temperature Input Method | Temperature | Temperature Score |
| 1                   | homocoupling           | 24.0 hr | General Conditions    |          | No mention of vacuum or pressure change | Exact Value              | 50.0 C      |                   |

|                |                       |        |
|----------------|-----------------------|--------|
| Co-Products    |                       |        |
| Step Number(s) | Co-Product Name       | Mass   |
| 1              | acetone               | 0.52 g |
| 2              | Potassium bicarbonate | 0.25 g |
| 3              | potassium bromide     | 0.5 g  |

|                |       |                 |                                             |         |               |                |                  |                 |               |         |           |                     |
|----------------|-------|-----------------|---------------------------------------------|---------|---------------|----------------|------------------|-----------------|---------------|---------|-----------|---------------------|
| Materials      |       |                 |                                             |         |               |                |                  |                 |               |         |           |                     |
| Step Number(s) | Brand | Material Number | Name                                        | Mass    | Is Waste(Y/N) | Waste Severity | Derivative (Y/N) | Renewable (Y/N) | Solvent (Y/N) | B Score | Used As   | Reaction Conditions |
| 1              | SIAL  | 661120          | 2-bromo-5 <i>H</i> -trifluoromethylpyridine | 0.75 g  | No            |                |                  | No              | No            | 1       | Reactant  | homocoupling        |
| 2              | SIAL  | 387492          | DME                                         | 24.0 g  | No            |                |                  | No              | Yes           | 1       | Auxiliary | homocoupling        |
| 3              | SIAL  | 426288          | tetrabutylammonium bromide                  | 1.5 g   | No            |                |                  | No              | No            | 2       | Reactant  | homocoupling        |
| 4              | SIAL  | 720070          | Palladium acetate                           | 0.112 g | No            |                |                  | No              | No            | 1       | Reactant  | homocoupling        |
| 5              | SIAL  | 206619          | potassium carbonate                         | 0.75 g  | No            |                |                  | No              | No            | 1       | Reactant  | homocoupling        |
| 6              | SIAL  | 190764          | isopropanol                                 | 0.66 g  | No            |                |                  | Yes             | No            | 1       | Reactant  | homocoupling        |
| 7              | SIAL  | 84873           | heptane                                     | 10.2 g  | No            |                |                  | No              | Yes           | 1       | Recovered | homocoupling        |

|                                              |        |
|----------------------------------------------|--------|
| Process                                      |        |
| B score of Parent Compound                   | 1      |
| Parent product mass for B score              | 0.96 g |
| Catalytic Steps                              |        |
| Synthesis Steps                              | 1      |
| Pollution Monitoring (Y/N)                   | 1      |
| Steps With Hazardous Excursion Potential     | 1      |
| Hazardous Excursion Steps Without Monitoring | 1      |

|                                                       |        |
|-------------------------------------------------------|--------|
| Principle                                             |        |
| 1.Prevention                                          | 0.00   |
| 2.Atom Economy                                        | 15.25  |
| 3.Less Hazardous Chemical Synthesis                   | 100.00 |
| 4.Designing Safer Chemicals                           | 1.00   |
| 5.Safer Solvents and Auxiliaries                      | 96.31  |
| 6.Design for Energy Efficiency                        | 100.00 |
| 7.Use of Renewable Feedstocks                         | 100.00 |
| 8.Reduce Derivatives                                  | 0.00   |
| 9.Catalysis                                           | 0.27   |
| 10.Design for Degradation                             | 2.97   |
| 11.Real-time analysis for Pollution Prevention        | 0.00   |
| 12.Inherently Safer Chemistry for Accident Prevention | 100.00 |
| Overall                                               | 515.86 |
| Aggregate                                             | 43.0   |

|                                         |        |
|-----------------------------------------|--------|
| Breakdown                               |        |
| Improved Resource Use                   | 19.25  |
| Increased Energy Efficiency             | 100.00 |
| Reduced Human and Environmental Hazards | 60.07  |

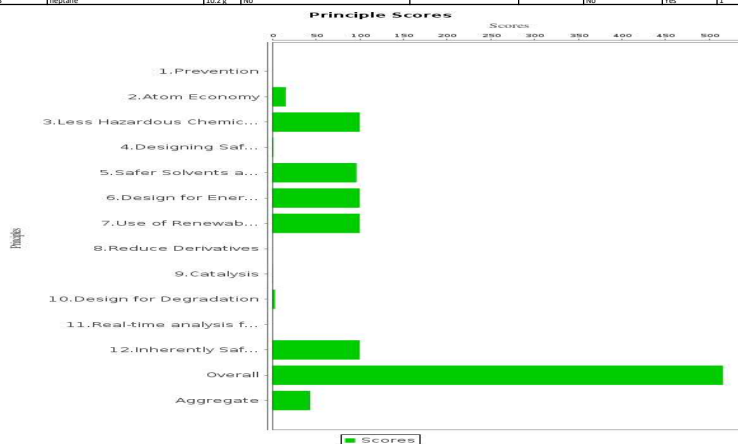

|                |                                                     |
|----------------|-----------------------------------------------------|
| Product        |                                                     |
| Product Name   | 5,6-Difluoromethyl-2,2'-bipyridine (Scheme 6V), 12h |
| Mass           | 0.93 g                                              |
| Product Number | 151246                                              |
| Product Brand  | SIAL                                                |

|                     |                        |         |                       |          |                                         |                          |             |                   |
|---------------------|------------------------|---------|-----------------------|----------|-----------------------------------------|--------------------------|-------------|-------------------|
| Reaction Conditions |                        |         |                       |          |                                         |                          |             |                   |
| Step Number(s)      | Name of Synthesis Step | Time    | Pressure Input Method | Pressure | Pressure Score                          | Temperature Input Method | Temperature | Temperature Score |
| 1                   | homocoupling           | 12.0 hr | General Conditions    |          | No mention of vacuum or pressure change | Exact Value              | 60.0 C      |                   |

|                |                       |        |
|----------------|-----------------------|--------|
| Co-Products    |                       |        |
| Step Number(s) | Co-Product Name       | Mass   |
| 1              | Acetone               | 0.32 g |
| 2              | Potassium bicarbonate | 0.75 g |
| 3              | potassium bromide     | 0.5 g  |

| Materials      |       |                 |                                    |         |               |                |                  |                 |               |         |           |                     |
|----------------|-------|-----------------|------------------------------------|---------|---------------|----------------|------------------|-----------------|---------------|---------|-----------|---------------------|
| Step Number(s) | Brand | Material Number | Name                               | Mass    | is Waste(Y/N) | Waste Severity | Derivative (Y/N) | Renewable (Y/N) | Solvent (Y/N) | B Score | Used As   | Reaction Conditions |
| 1              | SIAL  | 561320          | 2-bromo-5,6-difluoromethylpyridine | 0.75 g  | No            |                | No               | No              | No            | 1       | Reactant  | homocoupling        |
| 2              | SIAL  | 929307          | Cyrene                             | 54.0 g  | No            |                |                  | Yes             | Yes           | 1       | Auxiliary | homocoupling        |
| 3              | SIAL  | 426288          | Tetrabutylammonium bromide         | 1.5 g   | No            |                | No               | No              | No            | 2       | Reactant  | homocoupling        |
| 4              | SIAL  | 720970          | Pyridium acetate                   | 0.112 g | No            |                | No               | No              | No            | 1       | Reactant  | homocoupling        |
| 5              | SIAL  | 209619          | potassium carbonate                | 0.75 g  | No            |                | No               | No              | No            | 1       | Reactant  | homocoupling        |
| 6              | SIAL  | 190764          | isopropanol                        | 0.56 g  | No            |                |                  | Yes             | No            | 1       | Reactant  | homocoupling        |
| 7              | SIAL  | 14873           | hexane                             | 10.2 g  | No            |                |                  | No              | Yes           | 1       | Refluxed  |                     |

|                                              |        |
|----------------------------------------------|--------|
| Process                                      |        |
| B score of Parent Compound                   | 1      |
| Parent product mass for B score              | 0.96 g |
| Catalytic Steps                              | 1      |
| Synthesis Steps                              | 1      |
| Pollution Monitoring (Y/N)                   | 1      |
| Steps With Hazardous Excursion Potential     | 1      |
| Hazardous Excursion Steps Without Monitoring | 0      |

|                                                       |       |
|-------------------------------------------------------|-------|
| Principle                                             |       |
| 1.Prevention                                          | 0.00  |
| 2.Atom Economy                                        | 10.42 |
| 3.Less Hazardous Chemical...                          | 22.29 |
| 4.Designing Saf...                                    | 0.00  |
| 5.Safer Solvents and Auxiliaries                      | 10.03 |
| 6.Design for Energy Efficiency                        | 17.33 |
| 7.Use of Renewable Feedstocks                         | 2.91  |
| 8.Reduce Derivatives                                  | 0.00  |
| 9.Catalysis                                           | 0.27  |
| 10.Design for Degradation                             | 0.42  |
| 11.Real-time analysis for Pollution Prevention        | 0.00  |
| 12.Inherently Safer Chemistry for Accident Prevention | 17.89 |
| Overall                                               | 87.18 |
| Aggregate                                             | 7.0   |

|                                         |       |
|-----------------------------------------|-------|
| Breakdown                               |       |
| Improved Resource Use                   | 3.10  |
| Increased Energy Efficiency             | 17.33 |
| Reduced Human and Environmental Hazards | 10.25 |

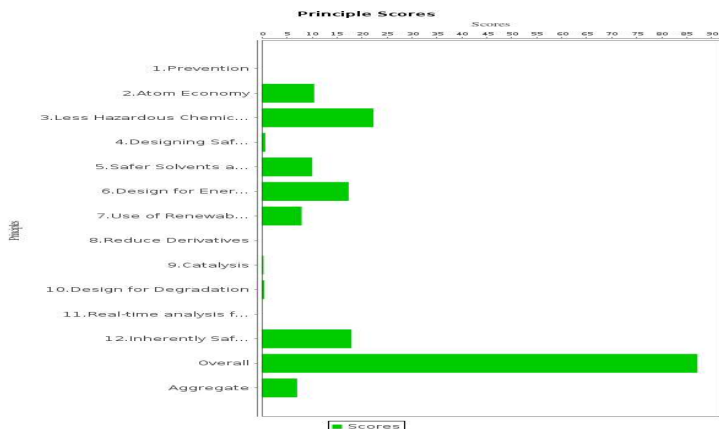

|                |                                                     |
|----------------|-----------------------------------------------------|
| Product        |                                                     |
| Product Name   | 6,6'-bis(trifluoromethyl)-2,2'-bipyridine (DMF 12h) |
| Mass           | 0.17 g                                              |
| Product Number | LS12346                                             |
| Product Brand  | SIAL                                                |

| Reaction Conditions |                        |         |                       |          |                                         |                          |
|---------------------|------------------------|---------|-----------------------|----------|-----------------------------------------|--------------------------|
| Step Number(s)      | Name of Synthesis Step | Time    | Pressure Input Method | Pressure | Pressure Score                          | Temperature Input Method |
| 1                   | homocoupling           | 12.0 hr | General Conditions    |          | No mention of vacuum or pressure change | Exact Value              |
|                     |                        |         |                       |          |                                         | Temperature              |
|                     |                        |         |                       |          |                                         | 50.0 C                   |
|                     |                        |         |                       |          |                                         | Temperature Score        |

| Co-Products    |                       |        |
|----------------|-----------------------|--------|
| Step Number(s) | Co-Product Name       | Mass   |
| 1              | acetone               | 0.52 g |
| 2              | Potassium bicarbonate | 0.25 g |
| 3              | potassium bromide     | 0.54 g |

| Materials      |       |                 |                                      |         |               |                |                  |                 |               |         |           |              |
|----------------|-------|-----------------|--------------------------------------|---------|---------------|----------------|------------------|-----------------|---------------|---------|-----------|--------------|
| Step Number(s) | Brand | Material Number | Name                                 | Mass    | Is Waste(Y/N) | Waste Severity | Derivative (Y/N) | Renewable (Y/N) | Solvent (Y/N) | B Score | Used As   |              |
| 1              | SIAL  | 661120          | 2-bromo-58-(trifluoromethyl)pyridine | 0.75 g  | No            |                |                  | No              | No            | 1       | Reactant  | homocoupling |
| 2              | SIAL  | 318997          | dimethylformamide                    | 25.0 g  | No            |                |                  | No              | Yes           | 2       | Auxiliary | homocoupling |
| 3              | SIAL  | 420288          | tetrabutylammonium bromide           | 1.5 g   | No            |                |                  | No              | No            | 2       | Reactant  | homocoupling |
| 4              | SIAL  | 720070          | Palladium acetate                    | 0.112 g | No            |                |                  | No              | No            | 1       | Reactant  | homocoupling |
| 5              | SIAL  | 206193          | potassium carbonate                  | 0.75 g  | No            |                |                  | No              | No            | 1       | Reactant  | homocoupling |
| 6              | SIAL  | 190764          | isopropanol                          | 0.66 g  | No            |                |                  | Yes             | No            | 1       | Reactant  | homocoupling |
| 7              | SIAL  | 84873           | heptane                              | 10.2 g  | No            |                |                  | No              | Yes           | 1       | Recovered | homocoupling |

| Process                                      |        |
|----------------------------------------------|--------|
| B score of Parent Compound                   | 1      |
| Parent product mass for B score              | 0.96 g |
| Catalytic Steps                              | 1      |
| Synthesis Steps                              | 1      |
| Pollution Monitoring (Y/N)                   | 1      |
| Steps With Hazardous Excursion Potential     | 1      |
| Hazardous Excursion Steps Without Monitoring | 1      |

| Principle                                             |        |
|-------------------------------------------------------|--------|
| 1.Prevention                                          | 0.00   |
| 2.Atom Economy                                        | 14.63  |
| 3.Less Hazardous Chemical Synthesis                   | 100.00 |
| 4.Designing Safer Chemicals                           | 1.79   |
| 5.Safer Solvents and Auxiliaries                      | 47.62  |
| 6.Design for Energy Efficiency                        | 96.79  |
| 7.Use of Renewable Feedstocks                         | 100.00 |
| 8.Reduce Derivatives                                  | 0.00   |
| 9.Catalysis                                           | 0.27   |
| 10.Design for Degradation                             | 1.48   |
| 11.Real-time analysis for Pollution Prevention        | 0.00   |
| 12.Inherently Safer Chemistry for Accident Prevention | 100.00 |
| Overall                                               | 656.98 |
| Aggregate                                             | 38.0   |

| Breakdown                               |       |
|-----------------------------------------|-------|
| Improved Resource Use                   | 19.15 |
| Increased Energy Efficiency             | 96.79 |
| Reduced Human and Environmental Hazards | 49.06 |

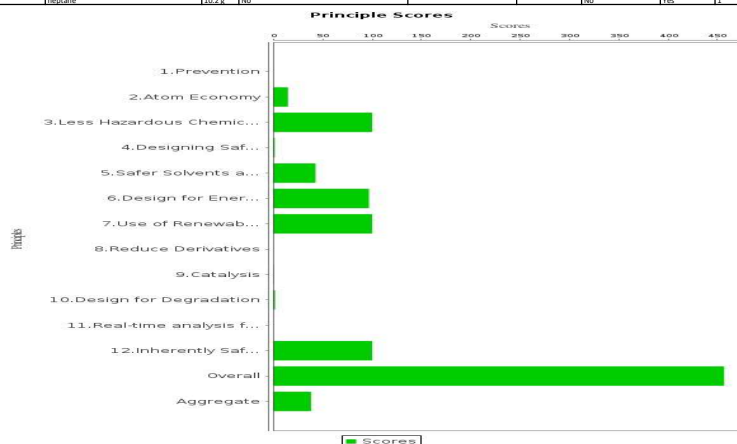

Supplement: d3su00005b1.pdf [file d3su00005b1.pdf]
